# Supplementary material for: Mitochondrial genomes of African pangolins and insights into evolutionary patterns and phylogeny of the family Manidae
Source: Springer Nature journal article supplement (doi:10.1186/s12864-017-4140-5), 2017-09-21
Supplement: 12864_2017_4140_MOESM1_ESM.pdf [file 12864_2017_4140_MOESM1_ESM.pdf]

1 **Mitochondrial genomes of African pangolins and insights into evolutionary**  
2 **patterns and phylogeny of the family Manidae**

3  
4 Zelda du Toit, Morné du Plessis, Desiré L. Dalton<sup>\*</sup>, Raymond Jansen, J. Paul Grobler and  
5 Antoinette Kotzé

6  
7 \*Corresponding Author, e-mail: [desire@nzg.ac.za](mailto:desire@nzg.ac.za) , (Tel) +27 12 328 3265

8  
9  
10  
11  
12  
13 **Additional Information Figures and Table**

22 **Fig. S1:** Bayesian mitogenome phylogenetic tree of all available pangolin mitogenomes.  
 23 Posterior probabilities are indicated on the respective branches. *A. jubatus* was selected as an  
 24 outgroup as pangolins are more closely related to the order Carnivora. Asterisks indicate the  
 25 misidentified mitogenomes.

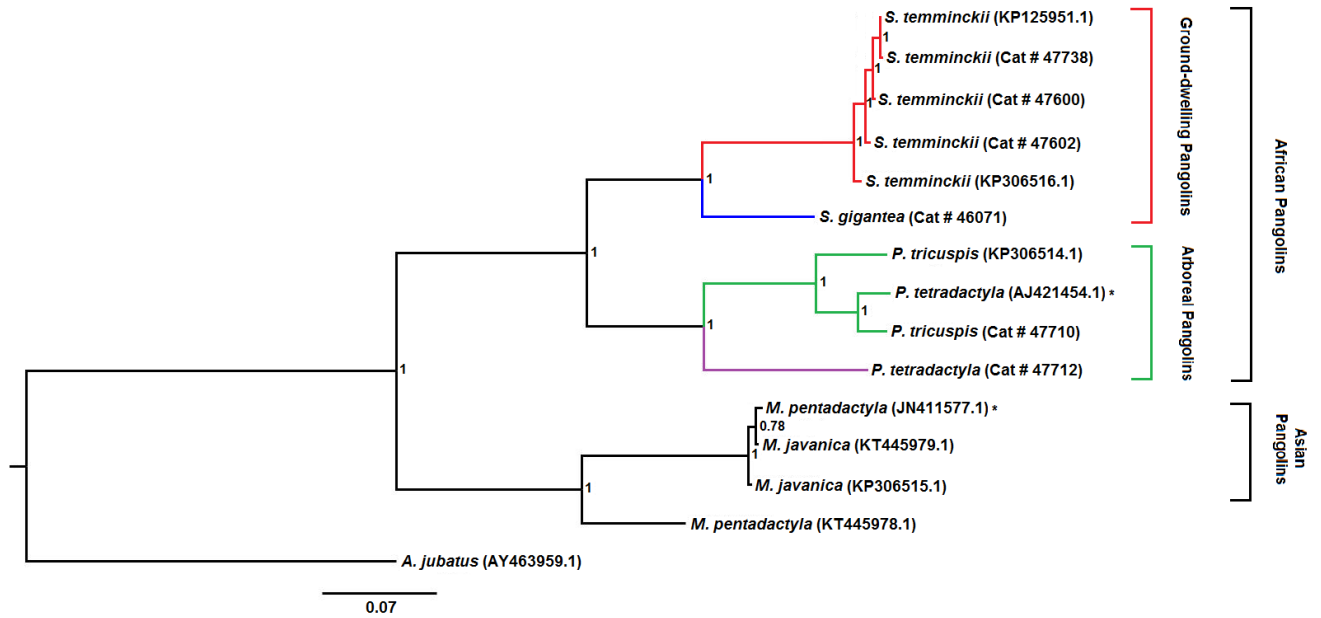

26  
 27  
 28  
 29  
 30  
 31  
 32  
 33  
 34

35 **Fig. S2:** Principal Component Analysis (PCA) of Relative Synonymous Codon Usage values  
36 (RSCU) for six pangolin species. Three distinct genera is present (*Manis*, *Phataginus* and  
37 *Smutsia*) in the (a) *CoxII*; (b) *NadI*, (c) *NadIII* genes. The two sub-families (Smutsiinae and  
38 Maninae) are distinguished in the (d) *AtpVIII*; (e) *NadIV*; (f) *NadVI* genes.

39 **(a)**

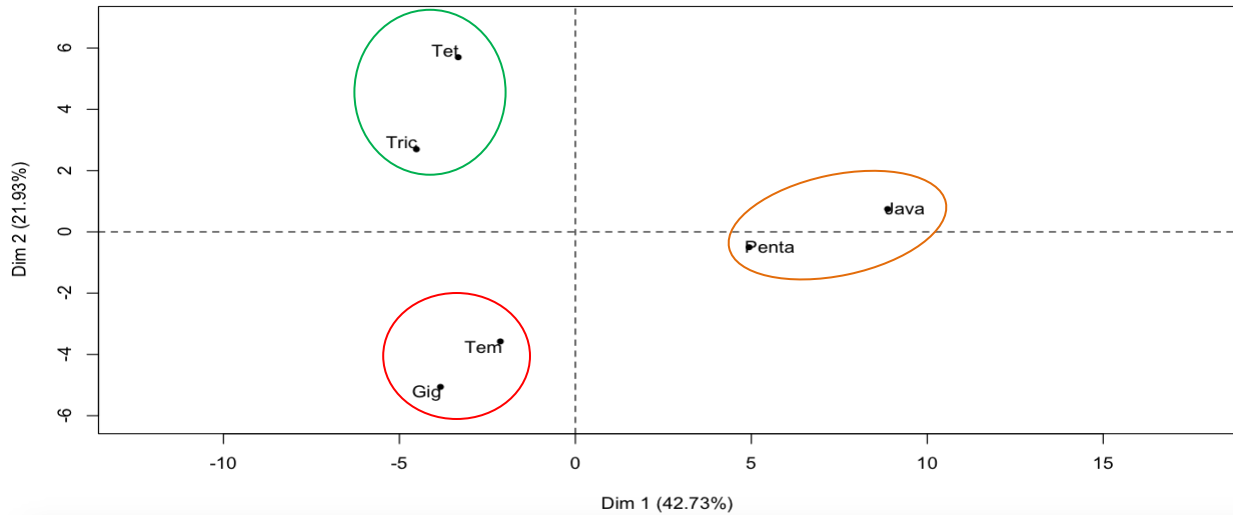

40

41

42 **(b)**

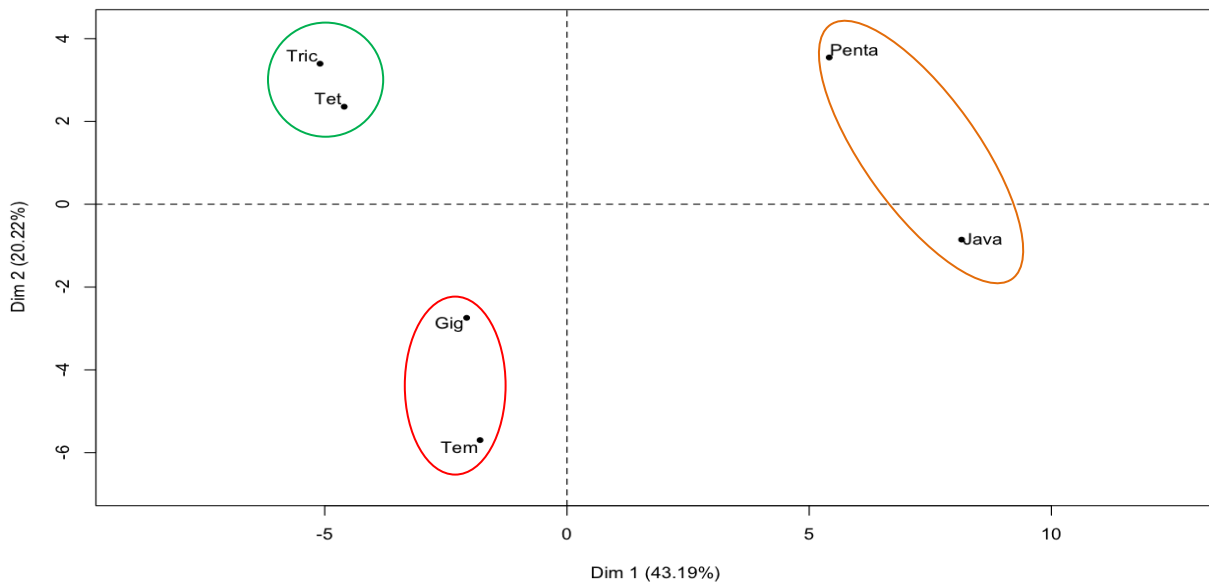

43

44 (c)

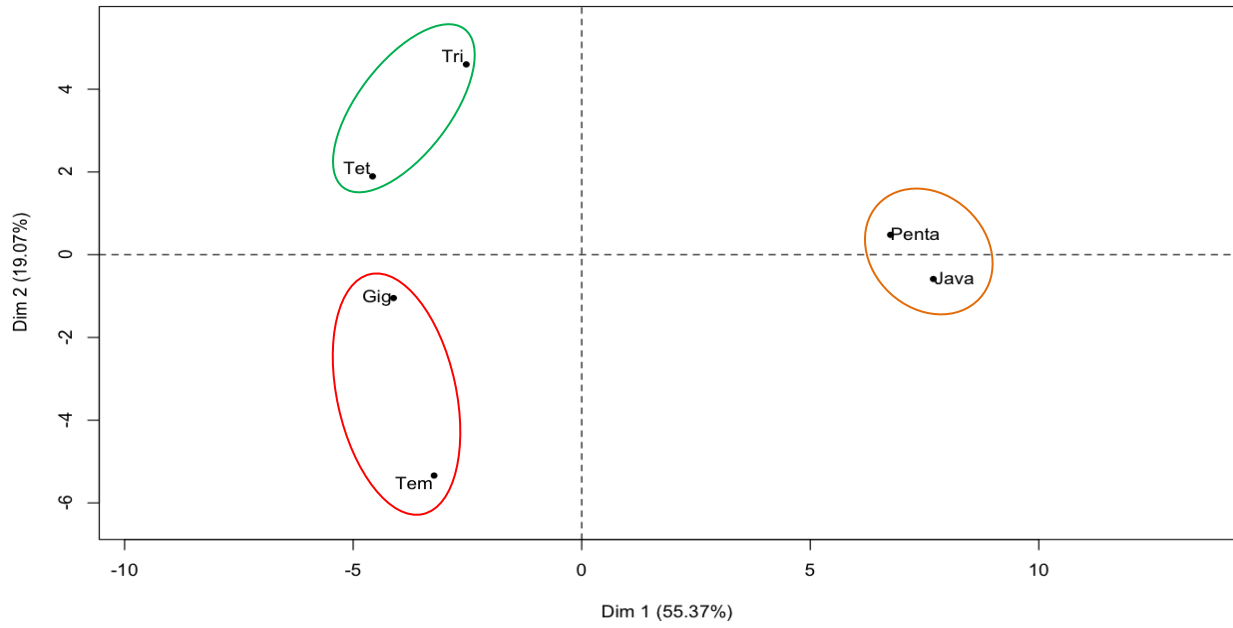

45

46

47 (d)

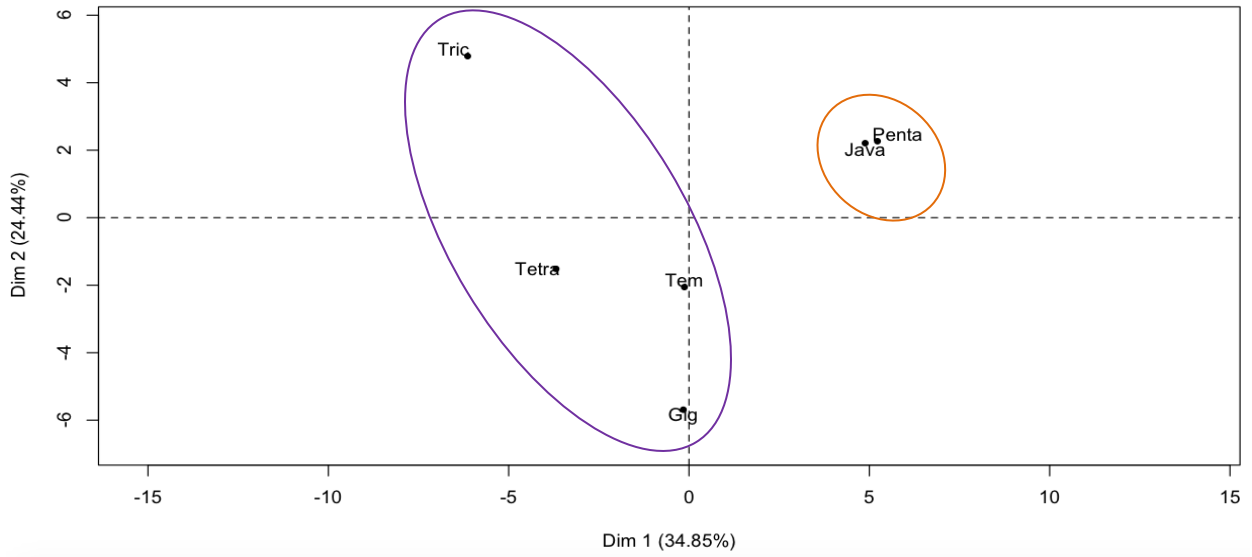

48

49

50

51

52 (e)

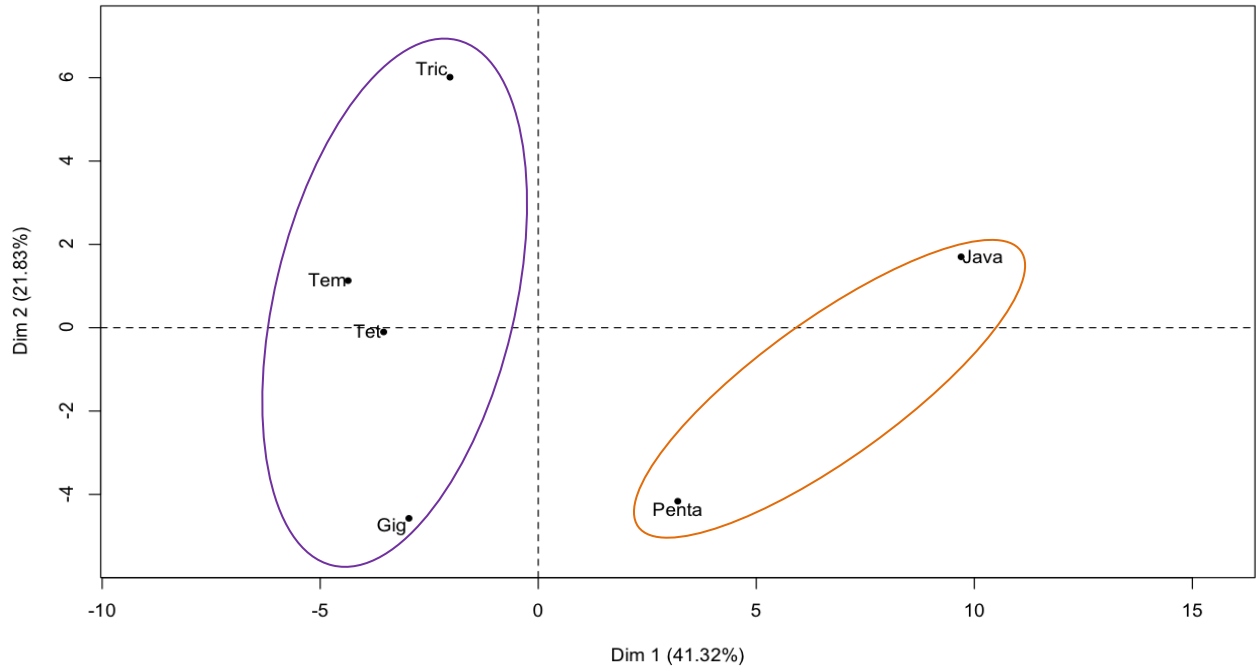

53

54

55 (f)

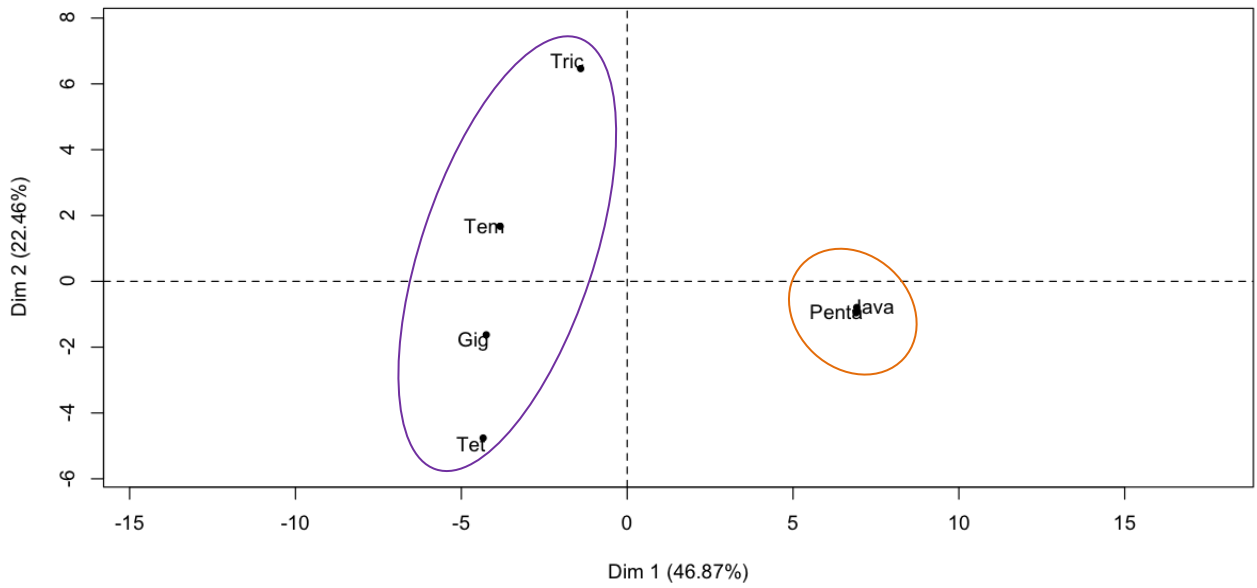

56

57

58

59 **Table S1:** List of nucleotide percentages and its 3<sup>rd</sup> codon position percentage (%).

| Species                | % of A | A3%  | % of T | T3% | % of G | G3%  | % of C | C3%  |
|------------------------|--------|------|--------|-----|--------|------|--------|------|
| <b>ATP6</b>            |        |      |        |     |        |      |        |      |
| <i>M. pentadactyla</i> | 34.4   | 46.7 | 26.4   | 20  | 9.8    | 2.6  | 29.4   | 30.8 |
| <i>M. javanica</i>     | 31.6   | 38.3 | 23.6   | 12  | 11.9   | 8.8  | 32.9   | 41.0 |
| <i>P. tricuspis</i>    | 32.4   | 40.4 | 31.7   | 32  | 10.7   | 6.2  | 25.2   | 20.9 |
| <i>P. tetradactyla</i> | 33.9   | 44.0 | 31.1   | 30  | 9.5    | 3.6  | 25.5   | 22.7 |
| <i>S. gigantea</i>     | 33.3   | 44.0 | 29.3   | 25  | 9.5    | 3.1  | 27.9   | 27.6 |
| <i>S. temminckii</i>   | 32.0   | 40.9 | 29.5   | 26  | 10.8   | 5.8  | 27.7   | 27.1 |
| <b>ATP8</b>            |        |      |        |     |        |      |        |      |
| <i>M. pentadactyla</i> | 38.8   | 43.3 | 23.9   | 16  | 7.5    | 9.0  | 29.9   | 31.3 |
| <i>M. javanica</i>     | 38.7   | 45.6 | 22.5   | 13  | 7.8    | 8.8  | 30.9   | 32.4 |
| <i>P. tricuspis</i>    | 35.9   | 39.4 | 33.3   | 41  | 6.1    | 6.1  | 24.7   | 13.6 |
| <i>P. tetradactyla</i> | 39.1   | 43.8 | 34.4   | 39  | 5.7    | 4.7  | 20.8   | 12.5 |
| <i>S. gigantea</i>     | 37.4   | 41.5 | 31.8   | 29  | 5.6    | 4.6  | 25.1   | 24.6 |
| <i>S. temminckii</i>   | 39.5   | 47.7 | 30.3   | 28  | 5.6    | 4.6  | 24.6   | 20.0 |
| <b>Cytb</b>            |        |      |        |     |        |      |        |      |
| <i>M. pentadactyla</i> | 30.9   | 42.9 | 25.6   | 14  | 13.4   | 3.4  | 30.1   | 40.0 |
| <i>M. javanica</i>     | 30.0   | 42.3 | 24.4   | 10  | 14.2   | 5.6  | 31.4   | 42.1 |
| <i>P. tricuspis</i>    | 30.9   | 41.5 | 31.1   | 26  | 13.1   | 3.2  | 25.0   | 29.6 |
| <i>P. tetradactyla</i> | 31.2   | 42.1 | 29.5   | 23  | 12.9   | 3.4  | 26.4   | 31.5 |
| <i>S. gigantea</i>     | 32.5   | 44.7 | 28.0   | 18  | 12.2   | 2.4  | 27.3   | 34.9 |
| <i>S. temminckii</i>   | 31.7   | 43.4 | 28.3   | 19  | 12.4   | 2.9  | 27.5   | 34.7 |
| <b>COI</b>             |        |      |        |     |        |      |        |      |
| <i>M. pentadactyla</i> | 28.4   | 39.3 | 27.9   | 21  | 16.6   | 5.8  | 27.1   | 33.7 |
| <i>M. javanica</i>     | 26.1   | 32.8 | 26.6   | 18  | 18.6   | 11.4 | 28.6   | 38.0 |
| <i>P. tricuspis</i>    | 27.0   | 26.8 | 34.1   | 26  | 16.8   | 29.2 | 22.0   | 18.4 |
| <i>P. tetradactyla</i> | 27.9   | 38.0 | 33.4   | 33  | 15.7   | 4.4  | 23.0   | 25.0 |
| <i>S. gigantea</i>     | 29.0   | 41.8 | 32.1   | 31  | 15.8   | 3.3  | 23.0   | 24.2 |
| <i>S. temminckii</i>   | 27.7   | 39.3 | 33.3   | 35  | 16.8   | 4.7  | 22.2   | 21.3 |
| <b>COII</b>            |        |      |        |     |        |      |        |      |
| <i>M. pentadactyla</i> | 32.6   | 41.7 | 24.9   | 17  | 13.5   | 6.1  | 29.1   | 35.5 |
| <i>M. javanica</i>     | 31.3   | 37.3 | 21.9   | 11  | 14.8   | 10.1 | 32.0   | 42.1 |
| <i>P. tricuspis</i>    | 32.6   | 42.7 | 30.8   | 31  | 13.4   | 5.7  | 23.2   | 20.7 |
| <i>P. tetradactyla</i> | 33.0   | 44.1 | 30.2   | 28  | 13.7   | 6.6  | 23.1   | 21.1 |
| <i>S. gigantea</i>     | 33.9   | 46.7 | 29.2   | 28  | 12.3   | 2.6  | 24.5   | 22.5 |
| <i>S. temminckii</i>   | 33.2   | 42.7 | 29.2   | 27  | 12.9   | 5.7  | 24.7   | 24.2 |
| <b>COIII</b>           |        |      |        |     |        |      |        |      |
| <i>M. pentadactyla</i> | 29.3   | 42.5 | 26.8   | 17  | 14.5   | 3.4  | 29.3   | 36.8 |
| <i>M. javanica</i>     | 27.8   | 39.1 | 24.4   | 11  | 15.8   | 6.9  | 32.0   | 42.9 |
| <i>P. tricuspis</i>    | 26.6   | 35.6 | 34.1   | 33  | 15.6   | 5.7  | 23.8   | 25.3 |
| <i>P. tetradactyla</i> | 28.2   | 39.1 | 33.2   | 30  | 13.8   | 1.9  | 24.8   | 29.1 |
| <i>S. gigantea</i>     | 29.6   | 44.1 | 29.8   | 24  | 13.9   | 1.5  | 26.7   | 30.3 |

|                        |      |      |      |    |      |      |      |      |
|------------------------|------|------|------|----|------|------|------|------|
| <i>S. temminckii</i>   | 28.1 | 37.5 | 31.7 | 27 | 14.9 | 6.5  | 25.3 | 29.1 |
| <b>ND1</b>             |      |      |      |    |      |      |      |      |
| <i>M. pentadactyla</i> | 32.8 | 52.8 | 24.8 | 11 | 12.3 | 3.1  | 30.0 | 33.0 |
| <i>M. javanica</i>     | 30.3 | 45.9 | 22.6 | 5  | 14.9 | 10.1 | 32.2 | 38.7 |
| <i>P. tricuspis</i>    | 31.0 | 46.3 | 30.9 | 26 | 13.1 | 5.4  | 25.0 | 22.2 |
| <i>P. tetradactyla</i> | 31.4 | 48.6 | 29.0 | 23 | 13.4 | 6.0  | 26.1 | 22.9 |
| <i>S. gigantea</i>     | 33.0 | 51.4 | 29.0 | 21 | 11.7 | 2.2  | 26.3 | 24.9 |
| <i>S. temminckii</i>   | 31.9 | 47.6 | 28.0 | 20 | 13.4 | 7.3  | 26.7 | 25.1 |
| <b>ND2</b>             |      |      |      |    |      |      |      |      |
| <i>M. pentadactyla</i> | 37.3 | 51.9 | 24.3 | 13 | 8.9  | 2.9  | 29.5 | 32.5 |
| <i>M. javanica</i>     | 37.1 | 52.3 | 21.2 | 5  | 10.5 | 6.4  | 31.3 | 36.1 |
| <i>P. tricuspis</i>    | 35.9 | 50.0 | 28.6 | 18 | 10.3 | 6.4  | 25.1 | 25.4 |
| <i>P. tetradactyla</i> | 38.2 | 54.9 | 29.5 | 23 | 9.1  | 2.9  | 23.3 | 19.7 |
| <i>S. gigantea</i>     | 38.9 | 55.8 | 27.2 | 15 | 7.9  | 1.7  | 26.0 | 27.5 |
| <i>S. temminckii</i>   | 38.3 | 54.3 | 28.3 | 18 | 8.0  | 2.6  | 25.3 | 24.6 |
| <b>ND3</b>             |      |      |      |    |      |      |      |      |
| <i>M. pentadactyla</i> | 34.6 | 53.9 | 25.1 | 9  | 11.0 | 3.5  | 29.4 | 33.9 |
| <i>M. javanica</i>     | 31.5 | 45.2 | 22.0 | 3  | 13.9 | 10.4 | 32.7 | 41.7 |
| <i>P. tricuspis</i>    | 31.9 | 51.3 | 31.6 | 20 | 11.3 | 3.5  | 25.2 | 25.2 |
| <i>P. tetradactyla</i> | 32.8 | 52.2 | 32.5 | 24 | 9.9  | .9   | 24.9 | 22.6 |
| <i>S. gigantea</i>     | 34.1 | 54.4 | 30.9 | 20 | 9.6  | .9   | 25.4 | 24.6 |
| <i>S. temminckii</i>   | 31.9 | 48.7 | 33.0 | 24 | 11.9 | 6.1  | 23.2 | 20.9 |
| <b>ND4</b>             |      |      |      |    |      |      |      |      |
| <i>M. pentadactyla</i> | 34.4 | 47.7 | 25.5 | 15 | 10.6 | 2.8  | 29.5 | 34.4 |
| <i>M. javanica</i>     | 32.4 | 44.0 | 21.9 | 6  | 12.6 | 6.8  | 33.0 | 43.1 |
| <i>P. tricuspis</i>    | 33.0 | 44.2 | 30.1 | 24 | 11.6 | 5.7  | 25.3 | 26.0 |
| <i>P. tetradactyla</i> | 33.7 | 45.6 | 30.5 | 28 | 10.3 | 3.3  | 25.5 | 23.5 |
| <i>S. gigantea</i>     | 34.1 | 47.7 | 28.8 | 22 | 10.1 | 2.2  | 27.1 | 28.2 |
| <i>S. temminckii</i>   | 34.0 | 45.8 | 29.2 | 26 | 10.7 | 4.6  | 26.0 | 23.9 |
| <b>ND4L</b>            |      |      |      |    |      |      |      |      |
| <i>M. pentadactyla</i> | 32.3 | 47.5 | 26.9 | 8  | 11.4 | 6.1  | 29.3 | 32.3 |
| <i>M. javanica</i>     | 30.6 | 41.4 | 26.3 | 10 | 12.5 | 10.1 | 30.6 | 30.6 |
| <i>P. tricuspis</i>    | 29.3 | 37.8 | 36.1 | 33 | 11.2 | 5.1  | 23.5 | 29.3 |
| <i>P. tetradactyla</i> | 27.2 | 34.7 | 35.0 | 30 | 12.6 | 6.1  | 25.2 | 27.2 |
| <i>S. gigantea</i>     | 30.6 | 44.9 | 36.4 | 31 | 10.2 | 1.0  | 22.8 | 30.6 |
| <i>S. temminckii</i>   | 28.9 | 40.8 | 32.0 | 26 | 12.6 | 5.1  | 26.5 | 28.9 |
| <b>ND5</b>             |      |      |      |    |      |      |      |      |
| <i>M. pentadactyla</i> | 34.9 | 44.6 | 24.8 | 13 | 9.8  | 1.3  | 30.4 | 40.9 |
| <i>M. javanica</i>     | 33.6 | 42.2 | 20.9 | 6  | 11.5 | 4.8  | 34.0 | 47.4 |
| <i>P. tricuspis</i>    | 34.1 | 44.8 | 29.9 | 24 | 11.4 | 4.3  | 24.5 | 26.8 |
| <i>P. tetradactyla</i> | 35.1 | 46.1 | 30.1 | 24 | 10.5 | 2.7  | 24.3 | 26.8 |
| <i>S. gigantea</i>     | 35.0 | 45.7 | 27.3 | 19 | 10.1 | 1.7  | 27.7 | 34.0 |
| <i>S. temminckii</i>   | 33.8 | 43.8 | 28.4 | 21 | 10.9 | 3.2  | 26.9 | 32.0 |

| ND6                    |      |      |      |    |     |     |      |      |
|------------------------|------|------|------|----|-----|-----|------|------|
| <i>M. pentadactyla</i> | 45.3 | 30.3 | 17.5 | 21 | 6.5 | 4.0 | 30.7 | 44.6 |
| <i>M. javanica</i>     | 43.8 | 27.4 | 13.7 | 19 | 9.0 | 6.9 | 33.5 | 46.3 |
| <i>P. tricuspis</i>    | 42.0 | 26.6 | 21.4 | 25 | 8.1 | 5.8 | 28.5 | 42.2 |
| <i>P. tetradactyla</i> | 41.8 | 26.0 | 22.0 | 25 | 6.4 | 5.2 | 29.9 | 43.4 |
| <i>S. gigantea</i>     | 45.1 | 30.1 | 19.5 | 24 | 6.4 | 3.5 | 29.1 | 42.8 |
| <i>S. temminckii</i>   | 43.4 | 30.2 | 20.5 | 24 | 7.2 | 3.5 | 28.9 | 42.4 |

60

61
